# 1 Proteomic profiling of aging brains identifies key proteins by which 2 cognitively healthy centenarians defy their age by decades

3

## 4 **Authors:**

5 Andrea B. Ganz, MSc<sup>1,2\*</sup>, Meng Zhang, MSc<sup>1,5,6\*</sup>, Frank Koopmans, PhD<sup>2</sup>, Ka Wan Li, PhD<sup>2</sup>, Suzanne  
6 S.M. Miedema, MSc<sup>2</sup>, Annemieke J.M. Rozemuller<sup>3,7</sup>, Marc Hulsman, PhD<sup>1,6</sup>, Netherlands Brain Bank<sup>7</sup>,  
7 Philip Scheltens, MD, PhD<sup>1</sup>, Jeroen J.M. Hoozemans, PhD<sup>3</sup>, Marcel J.T. Reinders, PhD<sup>6</sup>, August B. Smit,  
8 PhD<sup>2</sup>, and Henne Holstege, PhD<sup>1,4</sup>

9

## 10 **Author affiliations:**

11 <sup>1</sup>Alzheimer Center Amsterdam, Department of Neurology, Amsterdam Neuroscience, Vrije Universiteit  
12 Amsterdam, Amsterdam UMC, Amsterdam, The Netherlands

13 <sup>2</sup>Department of Molecular and Cellular Neurobiology, Center for Neurogenomics and Cognitive Research,  
14 Amsterdam Neuroscience, Vrije Universiteit Amsterdam, Amsterdam, The Netherlands

15 <sup>3</sup>Department of Pathology, Amsterdam Neuroscience, Amsterdam UMC, Amsterdam, The Netherlands

16 <sup>4</sup>Department of Clinical Genetics, Amsterdam Neuroscience, Vrije Universiteit Amsterdam, Amsterdam  
17 UMC, Amsterdam, The Netherlands

18 <sup>5</sup>Amsterdam UMC, Vrije Universiteit Amsterdam, Department of Epidemiology and Biostatistics,  
19 Amsterdam Public Health Research Institute, Amsterdam, The Netherlands

20 <sup>6</sup>Delft Bioinformatics Lab, Delft Technical University, Delft, The Netherlands

21 <sup>7</sup>Netherlands Institute for Neuroscience, Meibergdreef 47, 1105 BA Amsterdam, The Netherlands

22

23 \*co-first authors

24 ^co-last authors

25 †Corresponding author: Dr. Henne Holstege, Alzheimer Centrum Amsterdam, Amsterdam UMC, De  
26 Boelelaan 1118, 1081 HZ Amsterdam, The Netherlands, Tel: +31 20 4440816, Fax: +31 20 4448529,  
27 Email: [h.holstege@amsterdamumc.nl](mailto:h.holstege@amsterdamumc.nl)

28

## 1 **Abstract**

2 Some individuals reach extreme ages without any signs of cognitive decline. Here, we show that  
3 based on key proteins, cognitively healthy centenarians have a biologically younger brain. We  
4 compared the brain proteomic signatures of 58 self-reported cognitively healthy centenarians  
5 with 61 non-demented individuals and 91 AD patients. The abundance of 472 proteins strongly  
6 associated with AD Braak stages of which 64 were differentially regulated in centenarians. With  
7 increasing Braak stages, the abundance of toxic peptides of MAPT increased in AD patients,  
8 while these remained low in centenarians. Furthermore, the abundance of 174 proteins strongly  
9 changed with age, of which 108 were differentially regulated in centenarians. In fact, in brains  
10 from centenarians the abundances of essential proteins were representative of brains from  
11 individuals who were a median 18- and up to 28-years 'younger'. The proteins involved  
12 represent diverse cellular processes, and suggest that maintained protein homeostasis is  
13 central in maintaining brain-health.

## 1 Introduction

2 The incidence of aging-related diseases rises exponentially worldwide due to the increase of the  
3 average life expectancy over the last century <sup>1</sup>. Among these, Alzheimer's disease (AD) is one  
4 of the most prevalent and devastating <sup>2,3</sup>. AD is characterized by the neuropathological  
5 hallmarks of amyloid beta (A $\beta$ ) plaques and neurofibrillary tangles (NFTs) <sup>4,5</sup>. With increasing  
6 age, these neuropathological substrates are also found in the brains of non-demented  
7 individuals <sup>6-8</sup>. Approximately 30-40% of elderly individuals aged 79 or above have significant  
8 levels of AD-related neuropathology, whereas only a small subset (15%) is clinically diagnosed  
9 with AD <sup>9,10</sup>. At extreme ages, some cognitively healthy individuals accumulate levels of  
10 neuropathological substrates that can also be observed in AD patients. We previously found  
11 that a subgroup of the centenarians from the 100-plus Study cohort <sup>11</sup> was able to maintain the  
12 highest levels of cognitive performance, often for multiple years after reaching 100 years old,  
13 despite the accumulation of AD neuropathological change (ADNC), while others maintained  
14 cognitive health with relatively low levels of neuropathology <sup>8,12,13</sup>. This variability suggests that  
15 those who maintain cognitive health at high age are either resilient against the effects of ADNC,  
16 or resistant against the accumulation of pathology.

17 To learn how cognitive health can be maintained, it is imperative to maximally  
18 comprehend the cellular and biomolecular mechanisms of prolonged resilience and resistance  
19 against neurodegeneration-associated proteinopathies. However, this is not straightforward, as  
20 many neurodegeneration-associated proteins also change with increasing age <sup>14,15</sup>. In the aged  
21 and diseased brains, damaged proteins accumulate due to dysregulation of synthesis and  
22 degradation mechanisms, leading to loss-of-function and/or toxicity, which eventually  
23 contributes to the onset of neurodegenerative processes. We therefore set out to investigate  
24 whether centenarians differentially express specific proteins that support the prolongation of  
25 cognitive health. To this end, we compared brains from 58 centenarians with brains from 61  
26 non-demented (ND) individuals and 91 AD patients, covering an age range between 50–102  
27 years. We chose to explore the proteome from the middle temporal lobe (gyrus temporalis  
28 medialis, GTM2), as this is one of the most vulnerable regions for accumulation of ADNC during  
29 the process of AD. <sup>16,17</sup> With this approach, we aimed to identify proteins that are differentially  
30 abundant in centenarians compared to expectations based on ADNC and age. We  
31 hypothesized that these proteins support the prolonged maintenance of cognitive health, and  
32 that they may point to molecular mechanisms that can slow down or even reverse the  
33 processes of aging and AD.

34

## 1 Results

2 We performed mass spectrometry-based proteomic analysis of laser micro-dissected grey  
3 matter of the mid-temporal gyrus from 210 brains, including 58 brains from cognitively healthy  
4 centenarian, 61 brains from non-demented (ND) subjects and 91 brains from AD patients,  
5 covering a wide age range (Figure 1A). Characteristics of the 210 brains, including age, NIA  
6 Amyloid stage, Braak stage, *APOE* genotype, sex, and postmortem delay (PMD) are listed in  
7 Table S1. Quality and sample filtering resulted in 3,448 quantified proteins in 190 samples, i.e.,  
8 88 AD patients, 53 ND controls, and 49 centenarians. To investigate the molecular mechanisms  
9 underlying the resilience and resistance potential of centenarians, we set out to identify proteins  
10 that exhibit specific patterns in centenarian brains regarding neurodegeneration and aging. For  
11 this, we investigated (1) proteins whose abundance changed with increasing NIA Amyloid stage  
12 and Braak stage, which we used as a proxy for AD progression in the group of AD cases and  
13 ND individuals (Figure 1B and 1C), and (2) proteins that changed with age in ND controls. 472  
14 proteins representing the union from an ANOVA and a linear regression test (Methods) showed  
15 the strongest changes in abundance with increasing Braak stages (Braak-proteins) (Figure S1  
16 and Table S2). Using the same method, we identified 467 proteins with the strongest  
17 abundance-changes with increasing NIA Amyloid stage (AmyloidStage-proteins, Table S3). Of  
18 these AmyloidStage-proteins, 87.6% were also Braak-proteins (409/467), and 86.7% of the  
19 Braak-proteins were also AmyloidStage-proteins (409/472) (Figure S2); unique Braak-proteins  
20 (Table S4), and unique AmyloidStage-proteins (Table S5). Notably, the change in the  
21 abundance of the amyloid-beta precursor protein (APP) was identified both as part of the Braak-  
22 proteins and the AmyloidStage-proteins, and was driven purely by the differential abundance of  
23 the A $\beta$  peptide (Figure 1D and S3).

24 Braak-proteins were used as a proxy for AD. Hierarchical clustering of these proteins  
25 identified six clusters (Figure S4). EWCE cell type enrichment analysis using single-cell RNA-  
26 seq data from temporal cortical tissue as reference <sup>18</sup> and gene ontology (GO) analysis  
27 (Methods) indicated that with increasing Braak stage, we observed a decreased abundance of  
28 neuronal and mitochondrial proteins (cluster 1) and synapse-associated proteins (cluster 2). We  
29 observed an increased abundance of astrocyte- and endothelial cell-related proteins (cluster 3  
30 and 6), with a notable enrichment for processes associated with epithelial cell differentiation,  
31 extracellular matrix (ECM), and intermediate filaments (cluster 3) and metabolic processes  
32 related to detoxification/response to oxidative stress (cluster 6). Although no specific cell types  
33 were significantly associated with cluster 4 and 5, the latter was enriched with proteins involved

1 in processing pyridine-containing compounds, biosynthetic/metabolic processes, and glucose  
2 catabolic processes (Figure S5 and File S1).

3 Next, using a linear regression model on smoothed protein abundances in ND controls,  
4 we found that the abundance of 174 proteins changed significantly with age (Age-proteins),  
5 (Methods, Figure S6 and S7, and Table S6). These clustered into four unique patterns of age-  
6 related changes (hierarchical clustering, Figure S8), which were characterized using EWCE cell  
7 type enrichment analysis and GO enrichment analysis. We observed an age-associated  
8 increased abundance in cluster 1 proteins, while other clusters (cluster 2, 3, and 4) we observed  
9 a decreased abundance of proteins. Proteins in cluster 1 were enriched in excitatory neurons, in  
10 cluster 3 they were associated with oligodendrocytes and enriched for intermediate filament and  
11 myelination-related biological processes, and cluster 4 was significantly enriched in proteins  
12 associated with ribosome assembly. Notably, proteins in cluster 3 showed an accelerated  
13 decrease in abundance with age >80, indicating that oligodendrocyte-related aging may play a  
14 role after this age (Figure S9 and File S2). No specific cell types and GO terms were  
15 significantly associated with cluster 2. Notably, the abundance of many proteins in non-  
16 demented individuals have an age trajectory peaking at ~85, which is the median age at death  
17 in the sampled population (data not shown). Because these proteins have markedly higher  
18 levels in AD patients than in non-demented individuals, and we speculate that these non-  
19 demented individuals were on a trajectory towards AD at a later age but died due to other  
20 causes.

## 21 22 **CEN-Braak proteins: Differential expression of 64 Braak-proteins distinguishes between** 23 **brains from centenarians and AD patients with Braak stage IV**

24 Next, we explored which Braak-proteins are differentially expressed in centenarians and AD  
25 patients, as these proteins may underlie the resilience of centenarians to increasing AD  
26 pathology. For each of the 472 Braak-proteins, we performed a two-sided t-test between the  
27 abundances observed in AD cases and centenarians with Braak stage IV. The abundance of 64  
28 proteins (13.5% of all Braak-proteins) was significantly increased or decreased in the  
29 centenarians relative to the AD cases (CEN-Braak proteins, Table S7) with a median of 0.38  
30 (IQR: 0.26-0.54) absolute log<sub>2</sub>-fold-change (LFC). These 64 CEN-Braak proteins are  
31 significantly enriched in cluster 2 of the Braak-proteins (28/132) (Chi-square test, p=0.002),  
32 which is enriched in neuronal cells and synapse-related biological process ontologies. This  
33 suggests that a predominant feature of cognitively healthy centenarians over AD cases with  
34 Braak stage IV is their ability to maintain synaptic functions. The 16 CEN-Braak proteins with

1 the most significant abundance-difference across Braak stages in AD, ND, and centenarian  
2 groups are shown in Figure 2, with a complete CEN-Braak protein list in Figure S10.

3 To explore the molecular mechanisms that render the resilience to high Braak stages,  
4 we categorized the 64 CEN-Braak proteins based on their major biological functional description  
5 (Table S8). Here, we illustrate four categories: synaptic-, cytoskeleton-, microtubules-, and  
6 proteasome-related proteins (Table 1 and Figure 3); other categories are included in the  
7 supplementary file (Table S8 and Figure S11).

8 **Synaptic proteins.** Delayed changes were observed for synaptic proteins (Figure 3A): e.g.,  
9 VGF Nerve Growth Factor (VGF), Olfactomedin 1 and 3 (OLFM1 and OLFM3), CASK  
10 Interacting Protein 1 (CASKIN1), and members of the SNARE complex Syntaxin-1A (STX1A),  
11 Synaptosome Associated Protein 25 (SNAP25); proteins which were previously reported to  
12 associate with cognitive performance and neuropathology in older humans <sup>19,20</sup>. We also  
13 observed STX17 (Figure S11), another SNARE complex member which has been associated  
14 with autophagy <sup>21</sup>. We speculate that maintaining synaptic transmission may have a protective  
15 effect against cognitive decline.

16 **Cytoskeleton and microtubule-associated proteins.** Centenarians maintained the  
17 abundances of cytoskeleton and microtubule-associated proteins (Figure 3B and 3C). Among  
18 these, the abundance of proteins FHL1, EZR, CRK, CNN3, LASP1, and MAPT increased with  
19 the Braak stage in AD brains but remained low in centenarians. In contrast, the levels of CAP2,  
20 PHACTR1, ACTN2, and CEP170B decreased with Braak stage in AD but maintained  
21 abundance in centenarians. Indeed, neurons are particularly susceptible to microtubule defects  
22 and deregulation of the cytoskeleton is considered to be a common insult during the  
23 pathogenesis of AD.<sup>22</sup> Centenarians may be resilient to high Braak stages by maintaining the  
24 stabilization of the cytoskeleton and microtubules.

25 **Proteasome.** The abundance of proteasome proteins: ENO1, HSPB1, and STIP1 increased  
26 with Braak stage in AD brains but remained low in centenarian brains (Figure 3D). Low  
27 abundance of these proteins possibly reflects a non-compromised healthy proteostasis in  
28 centenarian brains.

29

### 30 **Different patterns were observed for MAPT peptides**

31 The abundance of microtubule-associated protein tau (MAPT), the source protein for NFTs,  
32 deserves specific attention. In AD patients the abundance of the MAPT protein is increased for  
33 Braak stages 4, 5 and 6, however, we do not observe this increase in centenarians with the  
34 same Braak stages (Figure 4A). This difference is particularly dependent on the peptides

1 comprising the microtubule-binding region (MTBR) in the C-terminal part of MAPT: the  
2 abundance of peptides that map to the N-terminal half of MAPT did not change with Braak stage  
3 (Figure 4B, Figure S12, and File S3). For Braak staging, NFT-*spread* across brain regions is  
4 neuropathologically assessed with Gallyas silver-staining and the AT8 antibody, to detect  
5 respectively aggregated and phosphorylated tau proteins<sup>23</sup>. The AT8 antibody binds the proline-  
6 rich part of MAPT at phosphorylation sites pS199, pS202 and pT205 (Figure 4B). In a subset of  
7 the cohort samples (75 AD patients, 35 ND controls, and 20 centenarians), we performed a  
8 quantitative immunohistochemistry (qIHC) analysis using the AT8 antibody, which indicated that  
9 the MAPT phosphorylation increased with Braak stage in AD cases but not in non-demented  
10 individuals and centenarians (Figure 4C). This suggests that MAPT phosphorylation is disease-  
11 associated, and may be associated with a relative increase in the abundance in the MAPT-  
12 MTBR region observed in the proteomics data. In fact, we found that the intensity of peptides  
13 from the N-terminal half showed much lower correlation with MAPT phosphorylation  
14 (Median=0.32, IQR=0.15-0.42) than peptides from the C-terminal half (Median=0.72, IQR=0.57-  
15 0.74).

16

### 17 **CEN-Age proteins: Age-related proteins indicate that centenarians have a younger brain** 18 **than expected for their age**

19 The cohort design also allowed for the identification of proteins that differentiate centenarians  
20 from the 'typical' aging population. To do this, we compared the abundance of each Age-protein  
21 observed in centenarians to the expected abundance, by extrapolation according to their age.  
22 The expected abundance was calculated using a linear regression model, which was trained  
23 with data from ND subjects aged between 50 and 96 (Methods). Of the 174 Age-proteins, the  
24 abundance of 108 Age-proteins was significantly different between the observed abundance in  
25 centenarians and the expected abundance (CEN-Age proteins, Table S9). The protein  
26 abundance levels in centenarians were representative of protein abundances observed in  
27 individuals with much younger ages.

28 Using protein abundance as an estimator of biological age (Methods), we found that for  
29 these 108 proteins, the centenarian temporal cortex is estimated to be a median of 18 years  
30 (IQR:13-23) and up to 28 years younger than their chronological age. For the 66 remaining Age-  
31 proteins, for which the difference between expected and observed protein abundance in the  
32 centenarian brain was not significantly different, the protein abundance in centenarians still  
33 corresponded with abundances observed in non-demented individuals who were a median of 11  
34 years younger (IQR:10-13) (Figure 5; Table S10).

1 To explore whether these proteins might serve to uphold brain function and promote  
2 resistance to age-related decline, we assigned the functions of these 108 proteins based on  
3 manual literature curation. We identified 22 functional protein groups, and present the 9 groups  
4 associated with the strongest differences between expected and observed abundance in  
5 centenarians in Table 2. Age-dependent abundance changes (Figure 6), comprise abundance  
6 changes in proteins associated with cellular proteostasis-, cytoskeleton-, microtubules-,  
7 metabolism-, immune-response-related-, synaptic-, neurofilament-, and myelin-related proteins  
8 (the remaining 13 protein groups are in Table S8; Figure S13).

9 **Cellular proteostasis.** Centenarians may preserve proteostasis by maintaining the expression  
10 of proteins that belong to the T-complex protein ring complex (TRiC complex, also known as  
11 Tailless complex polypeptide 1 (TCP-1) Ring Complex). TRiC complex assists in the folding  
12 of >10% of the cytosolic proteins including actin and tubulin, and it is also obligatory for folding  
13 of many other proteins such as heat shock proteins and chaperones.<sup>24</sup> While the age-related  
14 decrease in abundance of TRiC complex proteins CCT3, CCT6A, and CCT6B in ND subjects  
15 was limited, their abundances in centenarians resemble those of ND subjects who are up to 28  
16 years younger (median: 26, IQR: 25-26), such that expression of TRiC-complex proteins are  
17 among the strongest preserved across all protein groups (Figure 6A).

18 **Cytoskeleton and microtubule-associated proteins.** The next best maintained proteins are  
19 cytoskeleton-related proteins (PTK2B, CIT, ABLIM1, and NCKAP1/NCKAP1L), with  
20 abundances observed in brains of individuals who were also a median of 26 years younger  
21 (Figure 6B). Centenarians resisted the age-related increase of actin binding LIM protein 1  
22 (ABLIM1), which mediates interactions between actin filaments and cytoplasmic targets<sup>25</sup>.  
23 Likewise, they maintained the abundance of protein tyrosine kinase 2 beta (PTK2B) which  
24 regulates the reorganization of the actin cytoskeleton, cell polarization, cell migration, adhesion,  
25 spreading and bone remodeling<sup>26</sup>. The abundance of citron Rho-interacting kinase (CIT), a  
26 serine/threonine kinase that interacts with a variety of proteins involved in actin cytoskeleton  
27 rearrangement<sup>27</sup> was in accordance with levels observed in brains from 25 years younger  
28 individuals. Furthermore, we observed that the abundance of  $\beta$ -tubulin family proteins (TUBB  
29 and TUBB4A) and microtubule-associated protein 1B (MAP1B) in ND subjects remained high in  
30 centenarians, and in accordance with levels observed brains from 22 years younger individuals  
31 (Figure 6C).

32 **Immune-response-related proteins.** Centenarians also maintained levels of proteins involved  
33 in the regulation of the innate immune response e.g., complement factor B (C2/CFB) and  
34 Interleukin 2 (ILF2) (Figure 6D).



1 **Synaptic proteins.** Centenarians maintained high levels of synaptic proteins, but with diverse  
2 patterns. The abundance of IGSF21, SHANK2, SCN2A, and LRRC4B decreased with age in  
3 ND subjects but remained high in centenarians, while the opposite pattern was observed for the  
4 abundances of protein RIMBP2 and NCDN (Figure 6E). Immunoglobulin superfamily member  
5 21 (IGSF21) is a neurexin2 $\alpha$ -interacting membrane protein that selectively induces inhibitory  
6 presynaptic differentiation<sup>28</sup>. SHANK2, along with SHANK1 and SHANK3 constitute a family of  
7 proteins that function as molecular scaffolds in the postsynaptic density (PSD). SHANK directly  
8 interacts with GKAP and Homer, thus potentially bridging the N-methyl-D-aspartate receptor-  
9 PSD-95-GKAP complex and the mGluR-Homer complex in synapses<sup>29</sup>. Leucine Rich Repeat  
10 Containing 4B (LRRC4B) is one of the synaptic adhesion proteins, which regulates the  
11 formation of excitatory synapses<sup>30</sup>. Neurochondrin (NCDN) is a cytoplasmic neural protein of  
12 importance for neural growth, glutamate receptor (mGluR) signaling, and synaptic plasticity<sup>31</sup>.

13 **Cellular homeostasis and metabolism proteins.** We also observed that centenarians  
14 maintained high levels of proteins associated with cellular homeostasis (PON2 and GSTK1;  
15 Figure 6F) and cellular metabolism (SIRT2, SHMT2, AMPD2, CARNS1, HADHA, NDUFAF4,  
16 and AK3; Figure 6G). Paraoxonase 2 protein (PON2) is known for its hydrolytic and antioxidant  
17 activity, which protects brain cells from toxic substances, oxidative damage and inflammation<sup>32</sup>.  
18 Similarly, Glutathione S-Transferase Kappa 1 (GSTK1) is responsible for detoxifying a wide  
19 range of harmful compounds, for and breaking down reactive oxygen and nitrogen species  
20 (ROS) and reactive nitrogen species (RNS)<sup>33</sup>. Carnosine synthetase (CARNS1) catalyzes the  
21 formation of carnosine, which has been experimentally shown to reduce the effects of aging by  
22 antioxidant and anti-inflammatory properties<sup>34,35</sup>. Likewise, centenarians strongly resisted age-  
23 related decrease in abundance of the Sirtuin2 protein (SIRT2), an NAD<sup>+</sup> dependent  
24 deacetylase, which regulates microtubule acetylation and controls myelination, among its  
25 substrates<sup>36-38</sup>. SIRT2 is particularly interesting, because SIRT1 (which was not among the  
26 detected proteins, likely because abundance was too low) is well known for its protective effect  
27 against aging<sup>39</sup>. Adenylate Kinase 3 (AK3) involved in the reversible transfer of ATP to AMP,  
28 plays a key role in energy metabolism in the brain and is thought to regulate neuronal  
29 excitability<sup>40</sup>.

30 **Myelin proteins and neurofilament.** Furthermore, centenarians resisted the age-related  
31 decrease of proteins that play key roles in oligodendrocytes, that build and maintain the myelin  
32 sheaths of axons, and facilitate neuronal processing speed (Figure 6H). 2',3'-cyclic nucleotide  
33 3'-phosphodiesterase (CNP) likely protects axons by removing toxic 2',3'-cAMP and to replace it  
34 with axonal protectant adenosine<sup>41</sup>. Myelin-associated glycoprotein (MAG) and Myelin

1 oligodendrocyte glycoprotein (MOG) are critical for the formation and maintenance of myelin  
2 sheaths<sup>42-46</sup>. In line with the resistance to age-related axonal loss, centenarians also resisted  
3 decrease in neurofilaments. The abundance of neurofilament proteins (NF), i.e., NEFL, NEFM,  
4 and alpha-internexin (INA), structural components of axons and synapses<sup>47,48</sup>, in centenarian  
5 brains resembled the abundance observed in non-demented individuals who were 13 years  
6 younger (Figure 6I).

7

## 1 Discussion

2 With this work we identified, for the first time, brain proteins associated with molecular  
3 processes that potentially support the preservation of cognitive health at extreme ages. The  
4 centenarians of the 100-plus Study appear to resist important aspects of cognitive decline and  
5 overall aging<sup>11,49</sup>. We observed that the abundance of key proteins typically regulated with  
6 Braak stage is unchanged in centenarians, which may contribute to their resilience against AD.  
7 Moreover, we found that centenarians were delayed or escaped key age-related changes in  
8 protein-abundance, as they had abundances of these proteins representative of individuals who  
9 were a median of 18 years, and up to 28 years younger. These proteins represent diverse  
10 cellular processes, including protein folding and aggregation, cytoskeletal rearrangement,  
11 cellular metabolism homeostasis, proteasome functioning, immune signaling, synaptic and  
12 dendritic activity. Moreover, ~13.5% of the strongest Braak stage-related proteins play a  
13 potential role in the resilience of centenarians to higher Braak stages, representative of AD.  
14 Many of these proteins were synapse-associated proteins, suggesting that the centenarian  
15 brains maintained healthy neuronal synapses and dendrite functions despite accumulation of  
16 tau.

17 NFT accumulation may have limited or no adverse consequences in the centenarian  
18 brain. We speculate that this may be explained by the difference in abundance of peptides  
19 representing the C-terminal half of MAPT: these are increased with Braak stages in AD cases  
20 but not in non-demented individuals and centenarians. This C-terminal half of MAPT includes  
21 the aggregation-prone MTBR region with the R1-R4 repeats and paired helical filaments PHF6  
22 and PFH6\*, that form the aggregated core of the NFT that remains upon neuronal cell death<sup>50</sup>.  
23 In addition, the phosphorylation at the AT8 sites correlated with the increased abundance of the  
24 C-terminal peptides, which supports the idea that phosphorylation of these sites promotes the  
25 aggregation process of tau<sup>51</sup>. Future research will have to evaluate whether the increase in  
26 Braak stages in AD cases represents a relative increase in the toxic aggregated fraction of  
27 MAPT in AD cases compared to centenarians, who may have maintained the ability to efficiently  
28 degrade these toxic forms of MAPT.

29 Centenarians kept a younger temporal cortex based on a maintained abundance of 62%  
30 of the age-related proteins. Interestingly, we see that CEN-specific expression differences in  
31 proteins tend to amplify even further with increasing age. The largest difference was observed  
32 for TRiC complex proteins (with levels observed in 26 years younger brains). TRiC complex  
33 proteins are part of the cellular protein folding machinery, and assist in the folding of up to 10%  
34 of the cellular proteome in the cytosol. It is obligatory for the conformational folding of many

1 proteins including actin and tubulin, heat shock proteins and chaperones. It is also obligatory for  
2 the unfolding and translocation of unfolded or damaged proteins for proteolysis, thereby  
3 preventing protein aggregation. Interestingly, we also observed abundances in centenarians  
4 representative of younger ages for many substrates of the TRiC complex and other chaperones,  
5 chaperonins and co-chaperones<sup>52,53</sup>. Decreased levels of CCT proteins may lead to the loss of  
6 the TRiC complex, a loss of proteostasis and thus aggregation of its many client proteins,  
7 including tau, amyloid, huntingtin, and  $\alpha$ -synuclein<sup>53-56</sup>. These results suggest that maintaining  
8 high levels of chaperones and chaperone-associated proteins might be a fundamental  
9 requirement for maintained cellular health.

10 The next best age-shift in abundance is for proteins associated with the actin and  
11 microtubule cytoskeleton, cellular homeostasis, and metabolism, supporting the general  
12 functions of brain cells. As the actin cytoskeleton is involved in various aspects of cell biology,  
13 ranging from whole cell migration and phagocytosis to exocytosis, its maintenance and  
14 functioning is highly susceptible to disruption caused by aging. In fact, aging has been found to  
15 cause not only changes in the expression of actin but also disruption of the organization and  
16 dynamics of the actin cytoskeleton, also supported by the maintained abundance of PTK2B, CIT,  
17 and ABLIM1, for which altered abundance leads to the occurrence of age-related disorders.<sup>57</sup>  
18 The age-dependent decrease of TUBB and TUBB4A proteins provide support for microtubule  
19 loss as an important component of aging.<sup>58</sup> Centenarians appear to resist loss of microtubules  
20 (MT) as supported by their ability to maintain the abundance of axonal, myelin and synaptic  
21 proteins at levels representative for much younger individuals<sup>59</sup> Moreover, centenarians  
22 maintained the abundance of proteins that are associated with homeostasis of cellular  
23 metabolism, such as PON2, GSTK1, CARNS1, and SIRT2. In particular, carnosine synthetase  
24 (CARNS1) catalyzes the formation of carnosine, which has been shown to reduce the effects of  
25 aging by its antioxidant and anti-inflammatory properties<sup>60</sup>.

26 Furthermore, centenarians also maintained high levels of proteins associated synaptic,  
27 neurofilament, and myelin proteins, which contribute to the preservation of cognitive  
28 performance at extreme ages. Our data suggests that with age, impaired oligodendrocyte  
29 function may reduce the capacity to produce and maintain healthy myelin sheaths<sup>61</sup>, leading to  
30 myelin disruption, loss or impairment of conductivity of white matter axons and ultimately to  
31 cognitive deficits<sup>45,62,63</sup>. Related to this, neurofilament proteins, especially NEFL, have recently  
32 gained attention as biomarkers of neurodegeneration in CSF and plasma<sup>64</sup>. Changes in  
33 neurofilament abundance are linked to changes in both grey and white matter<sup>65</sup> and the  
34 increase of NfL levels in CSF or plasma is thought to reflect the decrease neurofilament in

1 parenchymal tissue as analyzed here. Our data suggest that the age-related decrease of  
2 neurofilament needs to be taken into account when interpreting CSF-NFL levels as a typical AD  
3 biomarker.

4 Our unique dataset and study approach provided a wealth of proteomic signals  
5 underlying the resistance to disease- or age-dependent cognitive decline. However, in this study,  
6 we measured the bulk proteome, which allows us to observe changes in only those proteins  
7 with sufficient abundance. Since microglia are sparse in the brain relative to other cell-types we  
8 speculate that the changes of microglia-specific, pruning- and immune-related proteins, may be  
9 underrepresented. Furthermore, bulk measurement did not allow us to directly associate cell-  
10 specific changes in protein abundance. We referred to single cell expression data from other  
11 datasets to assign cell types, but we acknowledge that scRNA expression is a limited proxy for  
12 protein expression<sup>66</sup>. We also highlight that protein signals may be carried by specific peptides  
13 within each protein, which may hold information of age-related protein processing, and our  
14 observations for A $\beta$  peptides in the APP protein and the C-terminal fragment of MAPT are a  
15 proof of principle for this phenomenon. Further, while we detected strong abundance-changes  
16 of highly relevant proteins with Braak-, Amyloid- or age (e.g. C4, CD44, GRIA3 and many  
17 others), these were not discussed in this manuscript, as we focused only the subset that was  
18 differentially expressed in centenarians. Therefore, to interrogate the trajectory of each  
19 measured protein relative to Braak stage, Amyloid stage or age, the data can be referenced with  
20 the link provided in the **Online resources**. Together, we acknowledge that to release the full  
21 potential of the different molecular constellation of the centenarian brains, a proteomic analysis  
22 with increased detection depth, analyses of posttranslational modifications, correlations with  
23 other neuropathologies, and comparison with other omics datasets is warranted.<sup>67</sup>

24

## 25 **Conclusion**

26 The centenarian brain appears biologically younger, by preserving the abundance of proteins  
27 critically associated with neurodegenerative disease. Maintained abundance of key cytoskeletal,  
28 synaptic, and myelination proteins may be crucial for the preservation of neuronal projections  
29 and synaptic connections. Additionally, centenarians have preserved the abundance of  
30 chaperones and chaperonins, which aid in proper folding and unfolding of client proteins,  
31 preventing their aggregation. Interestingly, analysis at the peptide level of APP and MAPT  
32 suggests that a lower propensity for protein aggregation in centenarians may contribute to their  
33 resistance to neurodegenerative processes. Together, with our approach to investigate the brain  
34 proteome of cognitively healthy individuals in context of an age-continuum of AD patients and

- 1 healthy individuals led to the identification of key molecular mechanisms that uphold brain
- 2 health until extreme ages.

## 1 References:

- 2 1. Le Couteur, D. G. & Thillainadesan, J. What Is an Aging-Related Disease? An  
3 Epidemiological Perspective. *Journals Gerontol. Ser. A* **2022**, 1–7 (2022).
- 4 2. Thies, W. & Bleiler, L. 2012 Alzheimer's disease facts and figures. *Alzheimer's Dement.* **8**,  
5 131–168 (2012).
- 6 3. Nichols, E. *et al.* Global, regional, and national burden of Alzheimer's disease and other  
7 dementias, 1990–2016: a systematic analysis for the Global Burden of Disease Study  
8 2016. *Lancet Neurol.* **18**, 88–106 (2019).
- 9 4. Montine, T. J. *et al.* National institute on aging-Alzheimer's association guidelines for the  
10 neuropathologic assessment of Alzheimer's disease: A practical approach. *Acta*  
11 *Neuropathol.* **123**, 1–11 (2012).
- 12 5. Hyman, B. T. *et al.* National Institute on Aging-Alzheimer's Association guidelines for the  
13 neuropathologic assessment of Alzheimer's disease. *Alzheimer's Dement.* **8**, 1–13 (2012).
- 14 6. Savva, G. M. *et al.* Age, Neuropathology, and Dementia. *N. Engl. J. Med.* **360**, 2302–  
15 2309 (2009).
- 16 7. Spires-Jones, T. L., Attems, J. & Thal, D. R. Interactions of pathological proteins in  
17 neurodegenerative diseases. *Acta Neuropathologica* vol. 134 187–205 (2017).
- 18 8. Zhang, M. *et al.* Resilience and resistance to the accumulation of amyloid plaques and  
19 neurofibrillary tangles in centenarians: An age-continuous perspective. *Alzheimer's*  
20 *Dement.* (2022) doi:10.1002/alz.12899.
- 21 9. Nelson, P. T. *et al.* Brains with Medial Temporal Lobe Neurofibrillary Tangles But No  
22 Neuritic Amyloid Plaques Are a Diagnostic Dilemma But May Have Pathogenetic Aspects  
23 Distinct from Alzheimer Disease. **68**, 774–784 (2009).
- 24 10. Nelson, P. T. *et al.* Correlation of alzheimer disease neuropathologic changes with  
25 cognitive status: A review of the literature. *Journal of Neuropathology and Experimental*  
26 *Neurology* vol. 71 362–381 (2012).
- 27 11. Holstege, H. *et al.* The 100-plus study of cognitively healthy centenarians: Rationale,  
28 design and cohort description. *Eur. J. Epidemiol.* **33**, 1229–1249 (2018).
- 29 12. Beker, N. *et al.* Association of Cognitive Function Trajectories in Centenarians with  
30 Postmortem Neuropathology, Physical Health, and Other Risk Factors for Cognitive  
31 Decline. *JAMA Netw. Open* **4**, 1–15 (2021).
- 32 13. Ganz, A. B. *et al.* Neuropathology and cognitive performance in self-reported cognitively  
33 healthy centenarians. *Acta Neuropathol. Commun.* **6**, 64 (2018).
- 34 14. Johnson, E. C. B. B. *et al.* Large-scale proteomic analysis of Alzheimer's disease brain  
35 and cerebrospinal fluid reveals early changes in energy metabolism associated with  
36 microglia and astrocyte activation. *Nat. Med.* **26**, 769–780 (2020).
- 37 15. Li, J. *et al.* Determining a multimodal aging clock in a cohort of Chinese women. *Med* 1–  
38 24 (2023) doi:10.1016/j.medj.2023.06.010.
- 39 16. de Flores, R. *et al.* Medial Temporal Lobe Networks in Alzheimer's Disease: Structural  
40 and Molecular Vulnerabilities. *J. Neurosci.* **42**, 2131–2141 (2022).
- 41 17. Dalton, M. A., Tu, S., Hornberger, M., Hodges, J. R. & Piguet, O. Medial temporal lobe  
42 contributions to intra-item associative recognition memory in the aging brain. *Front.*  
43 *Behav. Neurosci.* **7**, 57029 (2014).
- 44 18. Skene, N. G. & Grant, S. G. N. Identification of vulnerable cell types in major brain  
45 disorders using single cell transcriptomes and expression weighted cell type enrichment.  
46 *Front. Neurosci.* **10**, 16 (2016).
- 47 19. Wingo, A. P. *et al.* Large-scale proteomic analysis of human brain identifies proteins  
48 associated with cognitive trajectory in advanced age. *Nat. Commun.* **10**, (2019).
- 49 20. Carlyle, B. C. *et al.* Synaptic proteins associated with cognitive performance and  
50 neuropathology in older humans revealed by multiplexed fractionated proteomics.

- 1 *Neurobiol. Aging* **105**, 99–114 (2021).
- 2 21. Tian, X., Teng, J. & Chen, J. New insights regarding SNARE proteins in autophagosome-lysosome fusion. *Autophagy* vol. 17 2680–2688 (2021).
- 3
- 4 22. Sferra, A., Nicita, F. & Bertini, E. Microtubule dysfunction: A common feature of neurodegenerative diseases. *International Journal of Molecular Sciences* vol. 21 1–36 (2020).
- 5
- 6
- 7 23. Braak, H. & Braak, E. Neuropathological staging of Alzheimer-related changes. *Acta Neuropathol.* **82**, 239–259 (1991).
- 8
- 9 24. Kelly, J. J. *et al.* Snapshots of actin and tubulin folding inside the TRiC chaperonin. *Nat. Struct. Mol. Biol.* **29**, 420–429 (2022).
- 10
- 11 25. Yang, S. *et al.* Self-construction of actin networks through phase separation-induced abLIM1 condensates. *Proc. Natl. Acad. Sci. U. S. A.* **119**, (2022).
- 12
- 13 26. Ruusala, A. & Aspenström, P. The Atypical Rho GTPase Wrch1 Collaborates with the Nonreceptor Tyrosine Kinases Pyk2 and Src in Regulating Cytoskeletal Dynamics. *Mol. Cell. Biol.* **28**, 1802–1814 (2008).
- 14
- 15
- 16 27. Amano, M., Nakayama, M. & Kaibuchi, K. Rho-kinase/ROCK: A key regulator of the cytoskeleton and cell polarity. *Cytoskeleton* vol. 67 545–554 (2010).
- 17
- 18 28. Tanabe, Y. *et al.* IgSF21 promotes differentiation of inhibitory synapses via binding to neurexin2 $\alpha$ . *Nat. Commun.* **8**, (2017).
- 19
- 20 29. Lim, S. *et al.* Characterization of the Shank family of synaptic proteins. Multiple genes, alternative splicing, and differential expression in brain and development. *J. Biol. Chem.* **274**, 29510–29518 (1999).
- 21
- 22
- 23 30. Kwon, S. K., Woo, J., Kim, S. Y., Kim, H. & Kim, E. Trans-synaptic adhesions between netrin-G ligand-3 (NGL-3) and receptor tyrosine phosphatases LAR, protein-tyrosine phosphatase  $\delta$  (PTP $\delta$ ), and PTP $\sigma$  via specific domains regulate excitatory synapse formation. *J. Biol. Chem.* **285**, 13966–13978 (2010).
- 24
- 25
- 26
- 27 31. Fatima, A. *et al.* Monoallelic and bi-allelic variants in NCDN cause neurodevelopmental delay, intellectual disability, and epilepsy. *Am. J. Hum. Genet.* **108**, 739–748 (2021).
- 28
- 29 32. Manco, G. *et al.* Human Paraoxonase-2 (PON2): Protein Functions and Modulation. *Antioxidants 2021, Vol. 10, Page 256* **10**, 256 (2021).
- 30
- 31 33. Raza, H. Dual localization of glutathione S-transferase in the cytosol and mitochondria: implications in oxidative stress, toxicity and disease. *FEBS J.* **278**, 4243–4251 (2011).
- 32
- 33 34. Boldyrev, A. A., Aldini, G. & Derave, W. Physiology and pathophysiology of carnosine. *Physiological Reviews* vol. 93 1803–1845 (2013).
- 34
- 35 35. Wang-Eckhardt, L., Bastian, A., Bruegmann, T., Sasse, P. & Eckhardt, M. Carnosine synthase deficiency is compatible with normal skeletal muscle and olfactory function but causes reduced olfactory sensitivity in aging mice. *J. Biol. Chem.* **295**, (2020).
- 36
- 37
- 38 36. Fourcade, S., Outeiro, T. F. & Pujol, A. SIRT2 in age-related neurodegenerative disorders. *Aging (Albany NY)* **10**, 295 (2018).
- 39
- 40 37. Cacabelos, R. *et al.* Sirtuins in Alzheimer's Disease: SIRT2-Related GenoPhenotypes and Implications for PharmacoEpiGenetics. *Int. J. Mol. Sci.* **20**, (2019).
- 41
- 42 38. Manjula, R., Anuja, K. & Alcain, F. J. SIRT1 and SIRT2 Activity Control in Neurodegenerative Diseases. *Front. Pharmacol.* **11**, 1899 (2021).
- 43
- 44 39. Chen, C., Zhou, M., Ge, Y. & Wang, X. SIRT1 and aging related signaling pathways. *Mechanisms of Ageing and Development* vol. 187 111215 (2020).
- 45
- 46 40. Dzeja, P. & Terzic, A. Adenylate Kinase and AMP Signaling Networks: Metabolic Monitoring, Signal Communication and Body Energy Sensing. *Int. J. Mol. Sci. 2009, Vol. 10, Pages 1729-1772* **10**, 1729–1772 (2009).
- 47
- 48
- 49 41. Verrier, J. D. *et al.* Role of CNPase in the oligodendrocytic extracellular 2',3'-cAMP-adenosine pathway. *Glia* **61**, 1595–1606 (2013).
- 50
- 51 42. Lopez, P. H. H. & Lopez, P. H. H. Role of Myelin-Associated Glycoprotein (Siglec-4a) in



- 1 the Nervous System. 245–262 (2014) doi:10.1007/978-1-4939-1154-7\_11.
- 2 43. Ruskamo, S. *et al.* Human myelin proteolipid protein structure and lipid bilayer stacking.
- 3 *Cell. Mol. Life Sci.* **79**, 3 (2022).
- 4 44. Reindl, ( M *et al.* The spectrum of MOG autoantibody-associated demyelinating diseases.
- 5 *Nat. Rev. Neurol.* 2013 98 **9**, 455–461 (2013).
- 6 45. Papuc, E. & Rejdak, K. The role of myelin damage in Alzheimer’s disease pathology.
- 7 *Arch. Med. Sci.* **16**, 345–351 (2018).
- 8 46. Llorens, F., Gil, V. & Río, J. A. del. Emerging functions of myelin-associated proteins
- 9 during development, neuronal plasticity, and neurodegeneration. *FASEB J.* **25**, 463–475
- 10 (2011).
- 11 47. Khalil, M. *et al.* Neurofilaments as biomarkers in neurological disorders. *Nat. Rev. Neurol.*
- 12 2018 1410 **14**, 577–589 (2018).
- 13 48. Didonna, A. & Opal, P. The role of neurofilament aggregation in neurodegeneration:
- 14 lessons from rare inherited neurological disorders. *Mol. Neurodegener.* 2019 141 **14**, 1–
- 15 10 (2019).
- 16 49. Beker, N. *et al.* Longitudinal Maintenance of Cognitive Health in Centenarians in the 100-
- 17 plus Study. *JAMA Netw. Open* **3**, e200094–e200094 (2020).
- 18 50. Moloney, C. M., Lowe, V. J. & Murray, M. E. Visualization of neurofibrillary tangle maturity
- 19 in Alzheimer’s disease: A clinicopathologic perspective for biomarker research.
- 20 *Alzheimer’s and Dementia* vol. 17 1554–1574 (2021).
- 21 51. Despres, C. *et al.* Identification of the Tau phosphorylation pattern that drives its
- 22 aggregation. *Proceedings of the National Academy of Sciences of the United States of*
- 23 *America* vol. 114 9080–9085 (2017).
- 24 52. Pavel, M. *et al.* CCT complex restricts neuropathogenic protein aggregation via
- 25 autophagy. *Nat. Commun.* **7**, 1–18 (2016).
- 26 53. Ghozlan, H., Cox, A., Nierenberg, D., King, S. & Khaled, A. R. The TRiCky Business of
- 27 Protein Folding in Health and Disease. *Frontiers in Cell and Developmental Biology* vol.
- 28 10 1014 (2022).
- 29 54. Brehme, M. *et al.* A chaperome subnetwork safeguards proteostasis in aging and
- 30 neurodegenerative disease. *Cell Rep.* **9**, 1135–1150 (2014).
- 31 55. Grantham, J., Brackley, K. I. & Willison, K. R. Substantial CCT activity is required for cell
- 32 cycle progression and cytoskeletal organization in mammalian cells. *Exp. Cell Res.* **312**,
- 33 2309–2324 (2006).
- 34 56. Brackley, K. I. & Grantham, J. Subunits of the chaperonin CCT interact with F-actin and
- 35 influence cell shape and cytoskeletal assembly. *Exp. Cell Res.* **316**, 543–553 (2010).
- 36 57. Lai, W. F. & Wong, W. T. Roles of the actin cytoskeleton in aging and age-associated
- 37 diseases. *Ageing Research Reviews* vol. 58 101021 (2020).
- 38 58. Apple, E. & Chen, L. Neuronal microtubules impact lifespan. *Aging* vol. 11 6616–6617
- 39 (2019).
- 40 59. Fernandez-Valenzuela, J. J. *et al.* Enhancing microtubule stabilization rescues cognitive
- 41 deficits and ameliorates pathological phenotype in an amyloidogenic Alzheimer’s disease
- 42 model. *Sci. Rep.* **10**, 14776 (2020).
- 43 60. Hipkiss, A. R. On the enigma of carnosine’s anti-ageing actions. *Experimental*
- 44 *Gerontology* vol. 44 237–242 (2009).
- 45 61. Sams, E. C. Oligodendrocytes in the aging brain. *Neuronal Signal.* **5**, 20210008 (2021).
- 46 62. Kohama, S. G., Rosene, D. L. & Sherman, L. S. Age-related changes in human and non-
- 47 human primate white matter: from myelination disturbances to cognitive decline. *Age*
- 48 *(Dordr).* **34**, 1093–1110 (2012).
- 49 63. Hedden, T. *et al.* Multiple Brain Markers are Linked to Age-Related Variation in Cognition.
- 50 *Cereb. Cortex* **26**, 1388–1400 (2016).
- 51 64. Johansson, C. *et al.* Plasma biomarker profiles in autosomal dominant Alzheimer’s

- 1 disease. *Brain* (2023) doi:10.1093/brain/awac399.
- 2 65. Yuan, A. & Nixon, R. A. Neurofilament Proteins as Biomarkers to Monitor Neurological
- 3 Diseases and the Efficacy of Therapies. *Front. Neurosci.* **15**, (2021).
- 4 66. Guo, Y. *et al.* How is mRNA expression predictive for protein expression? A correlation
- 5 study on human circulating monocytes. *Acta Biochim. Biophys. Sin. (Shanghai)*. **40**, 426–
- 6 436 (2008).
- 7 67. Bennett, D. A. *et al.* Religious Orders Study and Rush Memory and Aging Project. *J.*
- 8 *Alzheimer's Dis.* **64**, S161–S189 (2018).
- 9 68. Chen, N. *et al.* Interaction proteomics of canonical Caspr2 (CNTNAP2) reveals the
- 10 presence of two Caspr2 isoforms with overlapping interactomes. *Biochim. Biophys. Acta -*
- 11 *Proteins Proteomics* **1854**, 827–833 (2015).
- 12 69. Braak, H. & Braak, E. Staging of alzheimer's disease-related neurofibrillary changes.
- 13 *Neurobiol. Aging* **16**, 271–278 (1995).
- 14 70. Braak, H., Alafuzoff, I., Arzberger, T., Kretzschmar, H. & Tredici, K. Staging of Alzheimer
- 15 disease-associated neurofibrillary pathology using paraffin sections and
- 16 immunocytochemistry. *Acta Neuropathol.* **112**, 389–404 (2006).
- 17 71. Schneider, C. A., Rasband, W. S. & Eliceiri, K. W. NIH Image to ImageJ: 25 years of
- 18 image analysis. *Nature Methods* vol. 9 671–675 (2012).
- 19 72. Hondius, D. C. *et al.* Profiling the human hippocampal proteome at all pathologic stages
- 20 of Alzheimer's disease. *Alzheimer's Dement.* **12**, 654–668 (2016).
- 21 73. Murtagh, F. & Legendre, P. Ward's Hierarchical Agglomerative Clustering Method: Which
- 22 Algorithms Implement Ward's Criterion? *J. Classif.* **2014 313 31**, 274–295 (2014).
- 23 74. Miedema, S. S. M. S. S. M. *et al.* Distinct cell type-specific protein signatures in GRN and
- 24 MAPT genetic subtypes of frontotemporal dementia. **10**, 1–20 (2022).
- 25 75. Darmanis, S. *et al.* A survey of human brain transcriptome diversity at the single cell level.
- 26 *Proc. Natl. Acad. Sci. U. S. A.* **112**, 7285–7290 (2015).
- 27 76. Hodge, R. D. *et al.* Conserved cell types with divergent features in human versus mouse
- 28 cortex. *Nature* **573**, 61–68 (2019).
- 29

1 **Acknowledgements**

2  
3 We thank and acknowledge all participating centenarians and their family members and the  
4 team who recruited and visited the centenarians and their family members over the years, who  
5 collected the neuropsychological data and informed them about the option for brain donation:  
6 Chandeny Bennewitz, Debbie Horsten, Elizabeth Wemmenhoven, Esther Meijer, Ilse Admiraal,  
7 Karlijn Pieterse, Kimberley van Vliet, Kimja Schouten, Linda Lorenz, Linette Thiessen, Marieke  
8 Graat, Nina Baker, Sanne Hofman, Sterre Rechthijt, and Tjitske Dijkstra. Finally, this work would  
9 not be possible without the great collaboration of the staff of the Netherlands Brain Bank.

10

11 **Consent Statement**

12 The study protocol was approved by the Medical Ethics Committee of the Amsterdam UMC.  
13 Informed consent was obtained from all participants. Brain donors consented to brain donation.

14

15 **Author Contribution Statement**

16 ABG, FK, KWL, AJMR and NBB collected and performed the proteomic measurements of the  
17 brain tissues donated to the 100-plus Study. MZ, ABG, MJTR, FK and SSMM have performed  
18 the data analysis. MZ, ABG, SSMM, JJMH, MJTR, ABS, and HH have written the manuscript.  
19 PS, JJMH, MJTR, ABS and HH supervised the research. HH designed the study. MZ, ABG, FK,  
20 KWL, SSMM, ABS and HH have verified the underlying data. All authors read and approved the  
21 manuscript.

22

23 **Data Sharing Statement**

24 The datasets generated during and/or analyzed during the current study are available  
25 from the corresponding author on reasonable request.

26

## 1 Tables and Figures

### 2 Table 1: CEN-Braak protein categorizing based on their biological functions

| Mechanistic process | Proteins adhering to mechanistic process                                                                    | LFC between avg. abundance in AD and Centenarians Median (IQR) |
|---------------------|-------------------------------------------------------------------------------------------------------------|----------------------------------------------------------------|
| Synaptic            | <b>Increased abundance:</b> ARRB1, CALB1;CALB2 <sup>†</sup> , MLC1                                          | Less increase: 0.43 (0.37-0.52)                                |
|                     | <b>Decreased abundance:</b> VGF, NGEF, CASKIN1, SYT12, SNAP25, STX1A, RPH3A, NECAB1, OLFM1, OLFM3           | Less decrease: -0.33 (-0.39 - -0.24)                           |
| Cytoskeleton        | <b>Increased abundance:</b> CRK, LASP1, CNN3, EZR, FHL1                                                     | Less increase: 0.50 (0.43-0.63)                                |
|                     | <b>Decreased abundance:</b> PHACTR1, CAP2, ACTN1;ACTN2;ACTN3 <sup>†</sup> , ACTN2, ACTN2;ACTN3 <sup>†</sup> | Less decrease: -0.35 (-0.37 - -0.34)                           |
| Microtubules        | <b>Increased abundance:</b> MAPT                                                                            | Less increase: 0.80                                            |
|                     | <b>Decreased abundance:</b> CEP170B                                                                         | Less decrease: -0.29                                           |
| Proteasome          | <b>Increased abundance:</b> HSPB1, STIP1, ENO1                                                              | Less increase: 0.67 (0.54, 0.79)                               |
|                     | <b>Decreased abundance:</b> NULL                                                                            | Less decrease: NA                                              |

3 <sup>†</sup>Multiple proteins shared these peptides, and thus we cannot distinguish to which protein they belong to and they  
 4 were annotated with multiple protein names.  
 5 Abbreviation: LFC, log2 fold change; IQR, interquartile range.

### 7 Table 2: The abundance of CEN-Age proteins in centenarian-brains is representative of 8 younger ages

| Mechanistic process     | Proteins adhering to a specific mechanistic process                                                                                              | Years younger* Median (IQR) |
|-------------------------|--------------------------------------------------------------------------------------------------------------------------------------------------|-----------------------------|
| Cellular proteostasis   | CCT3, CCT6A;CCT6B <sup>†</sup> , CCT6A, CCT6B                                                                                                    | 26.22 (25.66-26.54)         |
| Cytoskeleton            | PTK2B, CIT, ABLIM1, NCKAP1;NCKAP1L <sup>†</sup>                                                                                                  | 26.22 (24.33-25.21)         |
| Microtubules            | MAP1A;MAP1B <sup>†</sup> , MAP1B, TUBB, TUBB3;TUBB4A;TUBB4B <sup>†</sup> , TUBB3;TUBB6 <sup>†</sup> , TUBB4A;TUBB4B;TUBB8 <sup>†</sup> , TUBB4A, | 22.54 (21.29-23.97)         |
| Immune-response-related | C2;CFB <sup>†</sup> , ILF2                                                                                                                       | 20.19 (20.11-20.26)         |
| Synaptic                | SCN2A, SHANK2, IGSF21, LRRC4B, RIMBP2, NCDN                                                                                                      | 18.81 (14.85-21.76)         |
| Cellular homeostasis    | GSTK1, PON2                                                                                                                                      | 17.93 (15.14-20.72)         |
| Metabolism              | SIRT2, SHMT2, AMPD2, CARNS1, HADHA, NDUFAF4, AK3                                                                                                 | 15.49 (12.67-20.70)         |
| Myelin proteins         | MAG, MOG, ANLN, CNP                                                                                                                              | 13.34 (13.00-13.97)         |
| Neurofilament           | INA;NEFH;NEFL;NEFM;VIM <sup>†</sup> , INA, NEFL, NEFM                                                                                            | 13.19 (12.35-14.04)         |

9 <sup>†</sup>Multiple proteins shared these peptides, and thus we cannot distinguish to which protein they belong to and they  
 10 were annotated with multiple protein names.

11 \*The age-difference for which the average protein abundance observed in centenarians is observed in ND individuals.  
 12 Abbreviation: IQR, interquartile range.

13

It is made available under a [CC-BY-ND 4.0 International license](https://creativecommons.org/licenses/by-nd/4.0/).

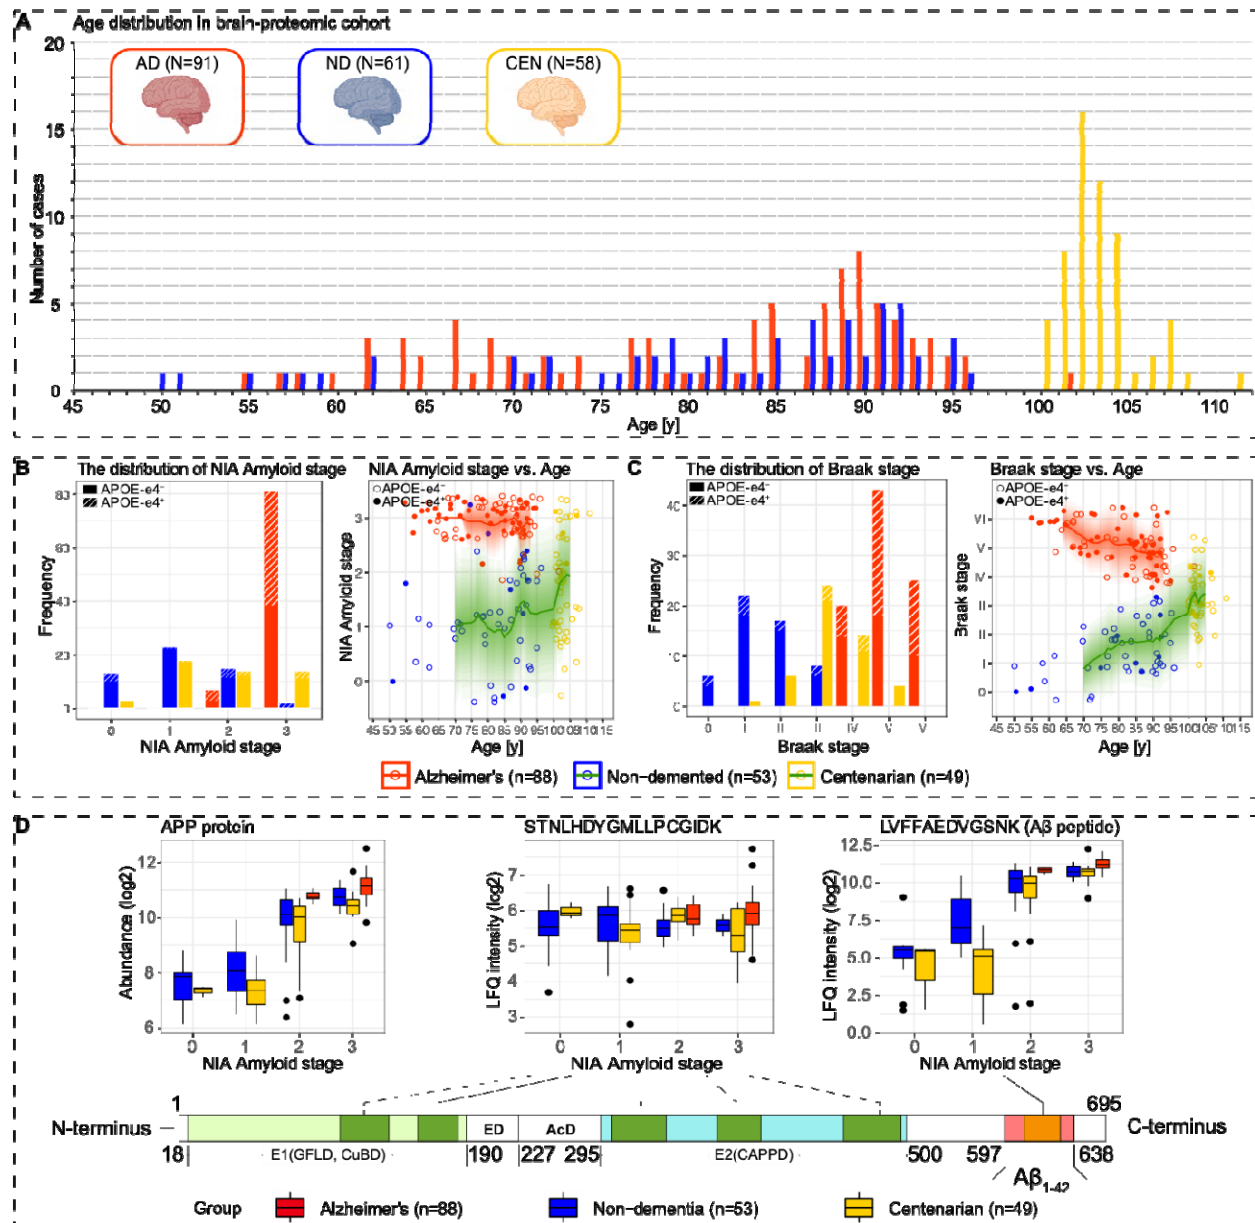

1  
2 **Figure 1.** Large-scale proteomic analysis identified AD- and aging-related proteins. **A.** Age distribution of  
3 brain-proteomic samples. Red: AD cases (N=91); blue: ND controls (N=61); yellow: centenarians (N=58).  
4 **B.** The distribution of NIA Amyloid stage in filtered samples and the level of NIA Amyloid stage across  
5 age in filtered AD cases and non-demented individuals (i.e., ND controls and centenarians). Filled circles:  
6 carriers of at least one *APOE-e4* allele. **C.** The distribution of Braak stage in filtered samples and its level  
7 across age in filtered AD cases and non-demented individuals (i.e., ND controls and centenarians). Filled  
8 circles: carriers of at least one *APOE-e4* allele. **D.** The abundance of amyloid precursor protein (APP) and  
9 APP peptides across NIA Amyloid stages. We selected the major APP isoform in the human brain as a  
10 representative, which has a length of 695 amino acids. The extracellular region of APP is divided into the  
11 E1 and E2 domains, linked by an extension domain (ED) and an acidic domain (AcD); E1 contains two  
12 subdomains including a growth factor-like domain (GFLD) and a copper-binding domain (CuBD)  
13 interacting tightly, and E2 is the central APP domain (CAPPD). Among the measured peptides, five  
14 maintained stable abundance across the NIA Amyloid stages, including peptide STNLHDYGMLLPCGIDK;

1 only one peptide (LVFFAEDVGSNK), which is from the A $\beta$ 1-42 fragment, increased with NIA Amyloid  
 2 stages.  
 3

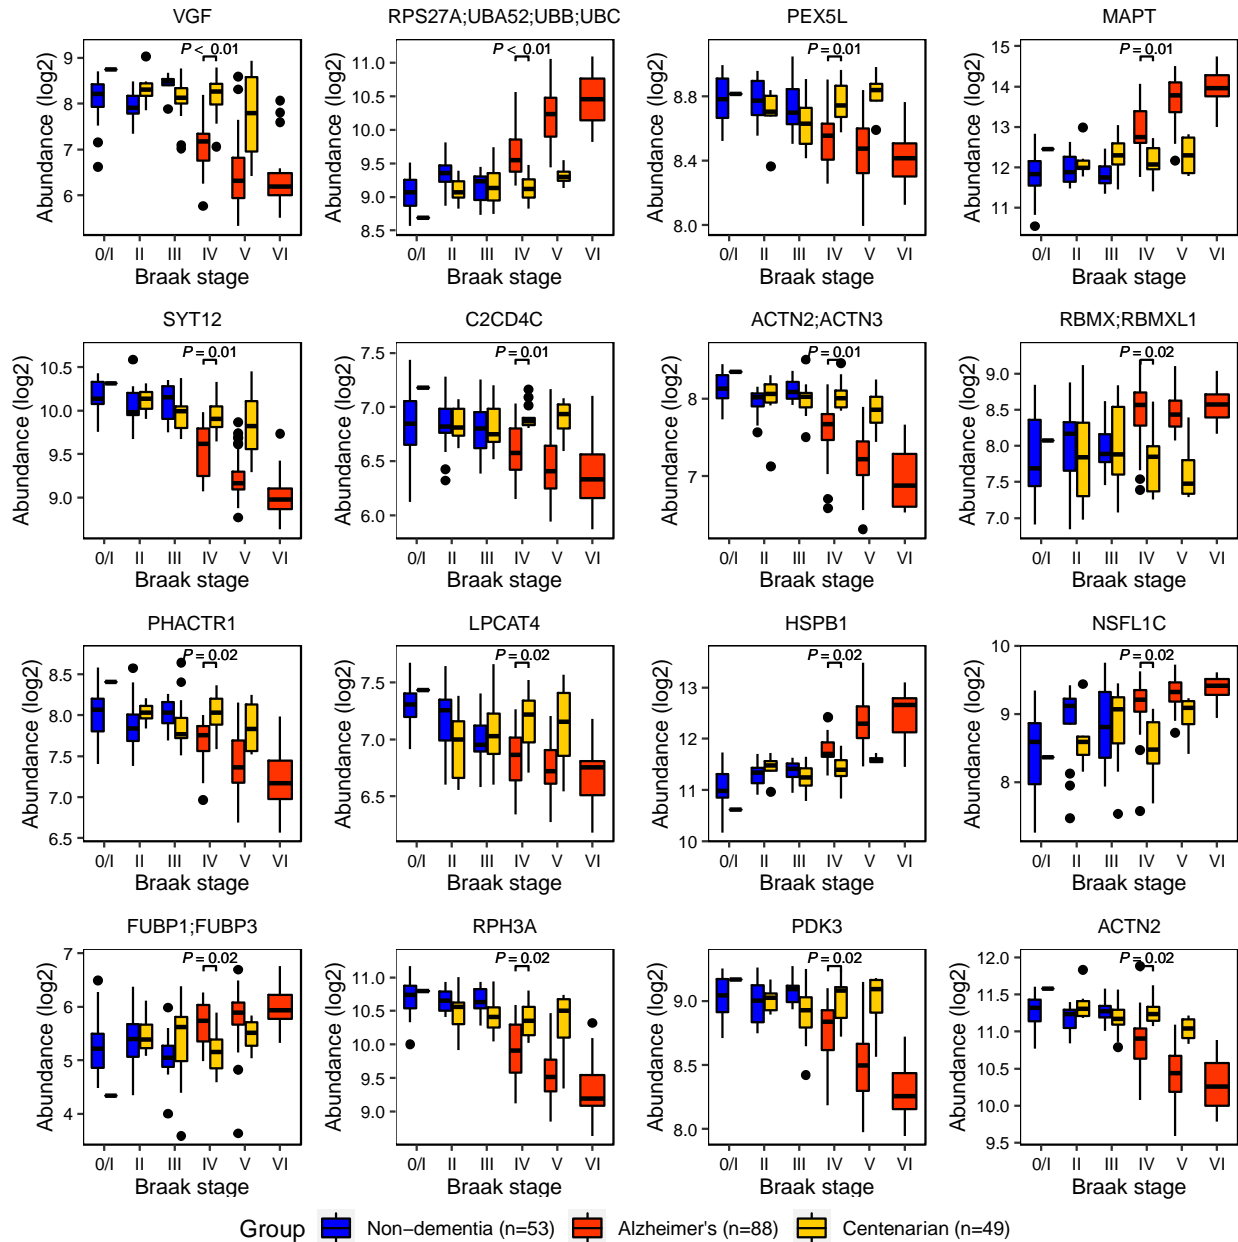

4  
 5 **Figure 2. The abundance of the top-16 CEN-B proteins across Braak stages.** The abundances  
 6 across Braak stages in AD, ND, and centenarian groups of the top 16 proteins with the most significant p-  
 7 p-values. The X-axis is the Braak stage from 0/I to VI; The Y-axis is the log<sub>2</sub>-transformed protein  
 8 abundance.  
 9

It is made available under a [CC-BY-ND 4.0 International license](https://creativecommons.org/licenses/by-nd/4.0/).

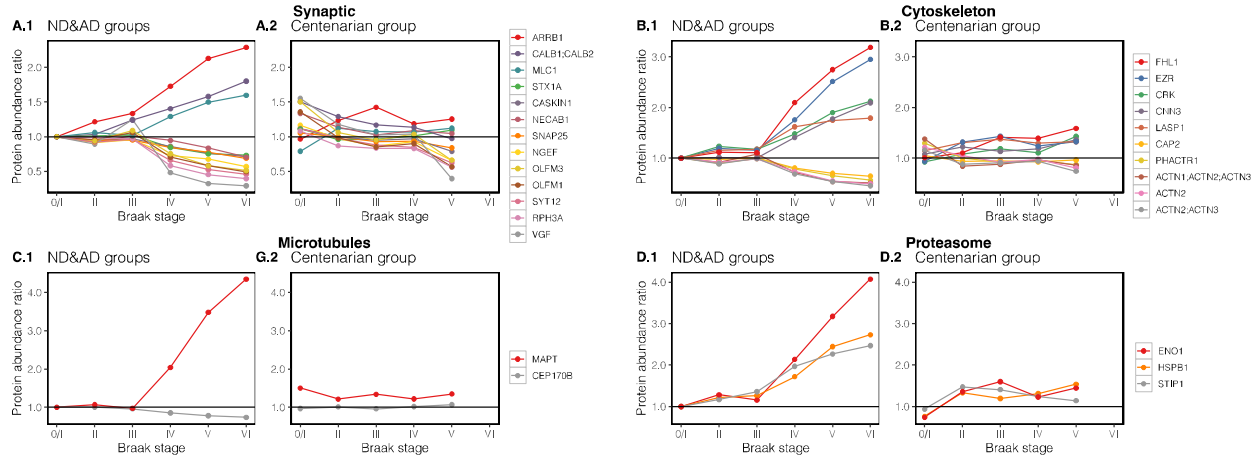

1  
2 **Figure 3. Abundance changes of CEN-B proteins vs. Braak stage.** Functional protein groups are  
3 displayed along Braak stages in AD and ND groups (left panel), centenarian group (right panel). Y-axis:  
4 Protein abundance ratio: the average abundance at each Braak stage (i.e., 0/I, II, III, IV, V, VI) is depicted  
5 relative to the average abundance at Braak stage 0/I in ND individuals.  
6

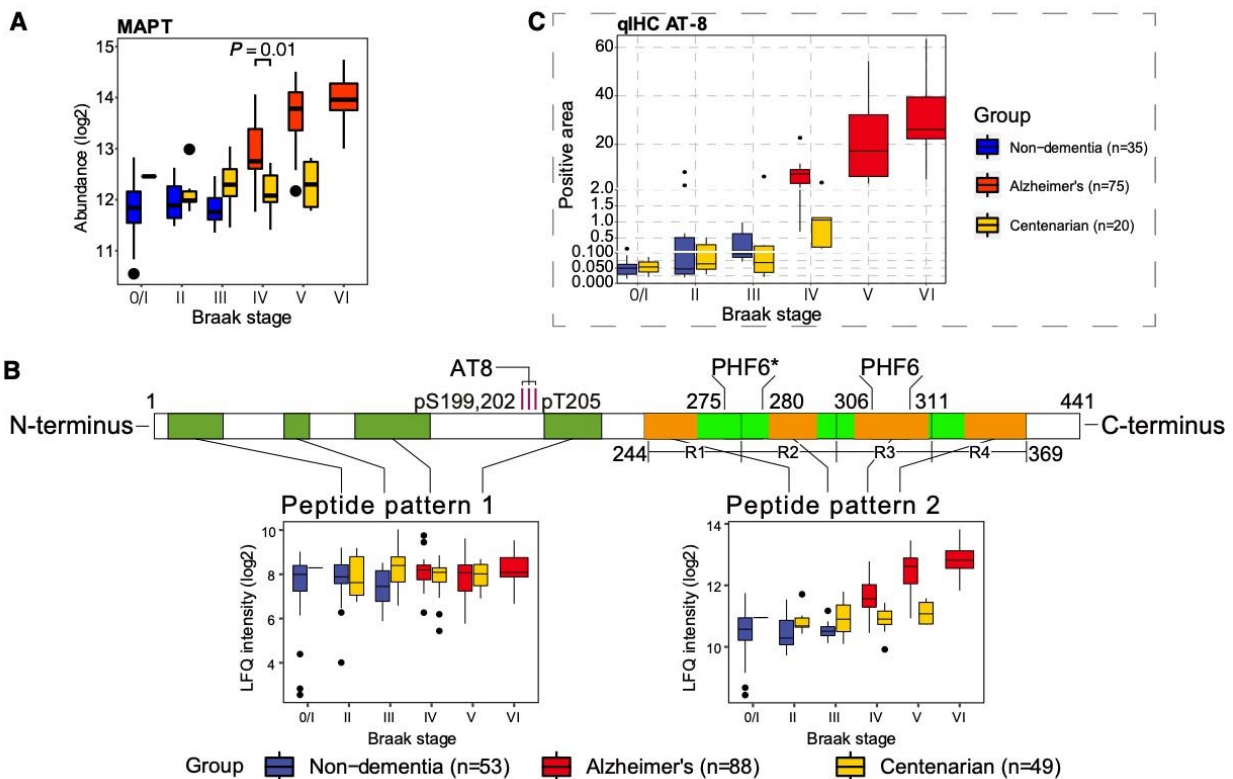

7  
8 **Figure 4. Distinguished pattern of MAPT protein in centenarian brains.** (A) The MAPT abundances  
9 across Braak stages in AD, ND, and centenarian groups. (B) Peptides from the proline-rich domain of  
10 MAPT did not change with increasing Braak stages in AD nor in centenarians, whereas peptides from the  
11 microtubule-binding region (MTBR) increase with Braak stages in AD cases, but not in centenarians. (C)  
12 Quantified positive area of AT8 staining of a subset of the cohort (20 centenarians, 75 AD cases and 30  
13 ND individuals) plotted against Braak stages in three different groups.

1

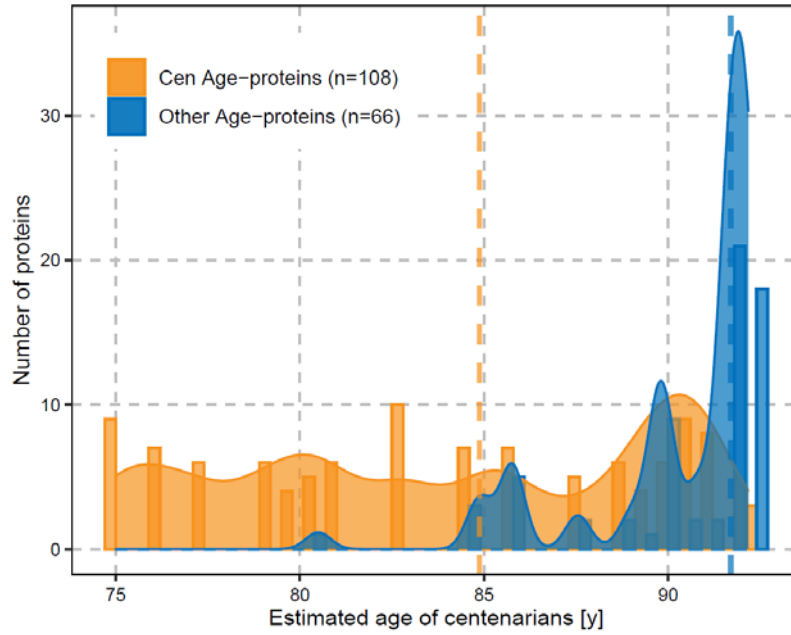

2

3 **Figure 5. The distribution of estimated age of centenarians according to Age-proteins.** Yellow bars  
 4 indicate the number of CEN-Age proteins that have an abundance in centenarian brains resembling the  
 5 abundance in ND brains at a certain age. The yellow curve was fitted based on the number of CEN-age  
 6 proteins across ages using a Gaussian kernel. Blue bars and the blue curve are plotted the same as red  
 7 bars and the red curve, but using the remaining Age-proteins. The yellow vertical line indicates the  
 8 median estimated age of centenarians based on CEN-Age proteins, and the blue vertical line indicates  
 9 the median estimated age of centenarians based on the remaining Age-proteins.

10

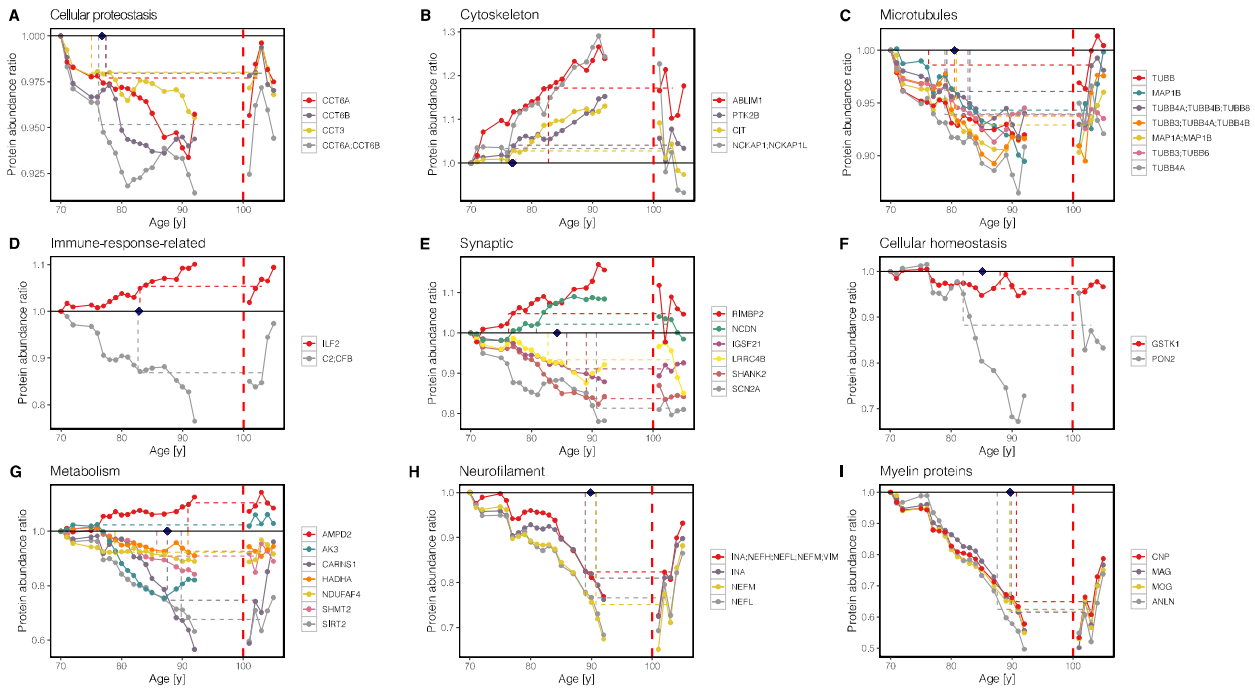

11



1 **Figure 6. The smoothed protein abundance vs. age in ND individuals and centenarians for CEN-**  
2 **Age proteins.** For proteins belonging to each group the smoothed protein abundances (Methods) for ND  
3 individuals and centenarians is plotted versus age. The horizontal dashed lines indicate for each protein,  
4 at which age the abundance in ND individuals is similar to the average abundance of centenarians. The  
5 blue diamond indicates the median estimated age of centenarians based on the proteins in the group.  
6 The vertical red dashed line indicates the dividing boundary between the abundance in the age  
7 continuum until 100 years, and abundance levels measured in centenarians.  
8

## 1 **Material and Methods**

### 2 **Cohorts**

3 Tissues from Alzheimer's disease (AD) cases and non-demented (ND) individuals were  
4 selected from the brain cohort collected by the Netherlands Brain Bank (NBB,  
5 <https://www.brainbank.nl/>). For each brain, we investigated clinical status prior to brain donation,  
6 to ascertain non-dementia and AD dementia. In total, we included 61 non-demented individuals  
7 spanning ages 50 to 96 and Braak stages 0 to III, and 91 AD cases with Braak stages from IV to  
8 VI, of which 48 AD cases had one copy of *APOE*- $\epsilon$ 4 allele, 43 AD cases had no *APOE*- $\epsilon$ 4  
9 allele, spanning the ages 55 to 95 and 62 to 102, respectively. The average postmortem delay  
10 (PMD) ranges from 2.0 to 12.9 h (mean 5.7 h).

11 Centenarian brains were donated to the 100-plus Study, a prospective cohort of  
12 centenarians in the Netherlands <sup>11</sup>. Inclusion criteria include self-reported and proxy-confirmed  
13 cognitive health and proof of age above 100 years. All participants were visited yearly at their  
14 home, where neuropsychological tests were performed. Yearly visits continued until death or  
15 until participation was no longer possible. Around 30% of 100-plus Study participants agree to  
16 post-mortem brain donation and tissue was collected in collaboration with the NBB. At the time  
17 of tissue selection for the proteomics experiment, 58 centenarians aged 100 to 111 had come to  
18 autopsy and were included. The average time between the last study visit and death is 9  
19 months ( $\pm$ 5 months) and postmortem delay ranges from 3.4 to 12.0 h (mean 6.5 h).

20 Detailed information of all 210 brains analyzed in this study, their age, Amyloid stage,  
21 Braak stage and *APOE* genotype, the sex and PMD are listed in Table S1.

### 23 **Sample preparation**

24 Fresh frozen tissue of the middle temporal lobe (gyrus temporalis medialis, GTM2) was cut in 10  
25  $\mu$ m thick sections using a cryostat and mounted on polyethylene naphthalate-membrane slides  
26 (Leica, Herborn, DE). Sections were fixed in 100% ethanol for 1 minute and stained using 1%  
27 (wt/vol) toluidine blue in H<sub>2</sub>O (Fluka Analytical, Buchs, Switzerland) for 1 minute. Laser micro  
28 dissection (LMD) was performed using a Leica AS LMD system (Leica, Wetzlar, Germany) to  
29 isolate 0.5 mm<sup>3</sup> of grey matter tissue and collected in 30  $\mu$ l M-PER lysis buffer (Thermo  
30 Scientific, Rockford, IL, USA) in 0.5 ml Eppendorf PCR tubes and stored at -80 °C until further  
31 use.

32 Samples were heated to 95 °C for 5 minutes and incubated in the dark with 50 mM  
33 Iodoacetamide for 30 min at room temperature. Samples were loaded on 10% Bis/Tris-  
34 polyacrylamide gels and run into the gel for 15 min at 80 V using 1.5 M Tris/Glycine SDS

1 running buffer pH 8.3. Gels were fixed overnight and stained with colloidal Coomassie Blue G-  
2 250, before samples were cut out and small gel pieces of about 1 mm<sup>3</sup> were placed in 96-well  
3 Nunc filter plates (Thermo Scientific, Rockford, IL, USA). Destaining, trypsin digestion, and  
4 peptide extraction were performed as described previously<sup>68</sup>.

5 Collected samples were dissolved in 100 µl Mobile phase A (2% acetonitrile/0.1% formic  
6 acid) and cleaned using the OASIS filter plate (Waters Chromatography Europe BV, Etten-Leur,  
7 The Netherlands) according to the manufacturer's instruction. We used a subset of all samples  
8 to generate a peptide library comprising 5 groups: (1) a pool of 4 young AD cases, (2) a pool of  
9 4 young ND individuals, (3) a pool of 4 old AD cases, (4) a pool 4 old ND individuals, (5) a pool  
10 of 8 centenarians. We further fractionated the sample pools using the Pierce high-pH reversed-  
11 phase fractionation spin columns (Thermo Scientific) according to manufacturer's instruction but  
12 using 0.1% acetic acid instead of 0.1% trifluoroacetic acid. The collected peptides were dried  
13 and stored at -20 °C until mass spectrometry analysis.

14

## 15 **Mass Spectrometry**

### 16 **Library generation**

17 For the spectral library generation, we performed a data dependent acquisition (DDA)  
18 experiment using the five pooled samples (Sample preparation). Peptides were analyzed by  
19 micro LC MS/MS using an Ultimate 3000 LC system (Dionex, Thermo Scientific) coupled to the  
20 TripleTOF 5600 mass spectrometer (Sciex). Peptides were trapped on a 5 mm Pepmap 100  
21 C18 column (300 µm i.d., 5 µm particle size, Dionex), and fractionated on a 200 mm Alltima C18  
22 column (100 µm i.d., 3 µm particle size). The acetonitrile concentration in the mobile phase was  
23 increased from 5 to 18% in 88 min, to 25% at 98 min, 40% at 108 min and to 90% in 2 min, at a  
24 flow rate of 5 µl/min. The eluted peptides were electro-sprayed into the TripleTOF MS, with a  
25 micro-spray needle voltage of 5500 V. The mass spectrometer was operated in a data-  
26 dependent mode with a single MS full scan (350-1250 m/z, 150 msec) followed by a top 25  
27 MS/MS (200–1800 m/z, 150 msec) at high sensitivity mode in UNIT resolution, precursor  
28 ion >150 counts/s, charge state from +2 to +5, with an exclusion time of 16 sec once the peptide  
29 was fragmented. Ions were fragmented in the collision cell using rolling collision energy, and a  
30 spread energy of 5 eV. The mass spectra were searched against the uniprot human fasta  
31 database (full proteome, release2018-04) and iRT standard peptides using MaxQuant software  
32 (version 1.6.3.4) with default settings. The MaxQuant results were imported into Spectronaut  
33 (Biognosys) and converted into a spectral library.

34

## 1 **Sample analysis**

2 Next, we measured the proteome of all 210 individuals, using data independent acquisition  
3 (DIA). The same LC gradient used by DDA was employed for DIA. The DIA protocol consisted  
4 of a parent ion scan of 150 ms followed by a selection window of 8 m/z with scan time of 80 ms,  
5 and stepped through the mass range between 450 and 770 m/z. The collision energy for each  
6 window was determined based on the appropriate collision energy for a 2<sup>+</sup> ion, centered upon  
7 the window with a spread of 15 eV. The data were analyzed using Spectronaut with the default  
8 settings. Each group of eluting peptide fragments in the raw data was matched to the spectral  
9 library by Spectronaut and yielded a compound identification score for the assigned peptide.  
10 The false discovery rate (FDR) of this quality metric was provided in Spectronaut output as q-  
11 value. In total, 28,191 peptides from 4,829 unique proteins were measured in 210 proteomic  
12 profiles.

13

## 14 **Quality control**

15 **Sample filtering:** The aim of sample filtering was to remove low-quality profiles. We selected  
16 high quality samples for analyses by removing samples for which the fraction of low-quality  
17 peptides (q-value  $\geq 0.01$ ) exceeded 34%, i.e., when the fraction of low-quality peptides  
18 increased sharply (n=19, Figure S14A and S14B). Second, we removed samples for which the  
19 distribution of peptide abundance deviated from the overall peptide abundance distribution  
20 (Kolmogorov–Smirnov distance  $> 0.04$ ) (n=1) (Figure S14C and S14D). After filtering, 190  
21 proteome profiles were left for analyses.

22 **Peptide filtering:** To ensure the reliability of the measured protein abundances, we performed  
23 peptide filtering based on peptide quality measures. For each protein, if  $\geq 90\%$  of the measured  
24 samples included at least one high-quality peptide (q-value  $< 0.01$ ), the measurement of this  
25 protein was considered to be reliable (n=3,448 and Table 11); otherwise, it was considered  
26 unreliable (n=1,381). For protein-measurements considered reliable, the sum of the abundance  
27 of all peptides appertaining to one protein was computed, which represented the abundance of  
28 this protein across individuals. This allows for the comparison of protein abundance between  
29 individuals, but not between the abundance of different proteins within one individual. We log<sub>2</sub>-  
30 transformed protein abundance values for analyses.

31 **Variance explanation analysis:** We used a mixed-effect linear model from the R-package  
32 “variancePartition” to assess the percentage of protein expression variance explained by age,  
33 sex, Braak stage, NIA amyloid stage, postmortem delay (PMD), *APOE* genotype, brain weight,  
34 and data acquisition batch. PMD, sex, and *APOE* genotype explained only minute proportions of

1 variance in the proteomic abundance profile. However, next to Braak-stage and age (the effect  
2 of which we intended to assess in our analysis), the batch explained substantial proportions of  
3 variance (Figure S15A). We removed batch effects using the “Combat” R-package. After using  
4 “Combat”, we reassessed protein expression variance using the mixed-effect linear model,  
5 which indicated that the proportion of variance explained by batches was largely removed  
6 (Figure S15B).

7

## 8 **Neuropathological measurement**

9 Neuropathological assessments of the NBB cohort and the 100-plus Study cohort were  
10 performed by the NBB, as described previously<sup>13</sup>. In this study, we investigated the levels of  
11 two AD hallmarks: (1) A $\beta$  plaques using NIA Amyloid stage<sup>5</sup>, and (2) NFTs using Braak stage  
12 <sup>23,69,70</sup>. Brain weight was recorded during autopsy. The centenarian brains and majority of the  
13 brains in the age-continuum were evaluated by a single neuropathologist, such that interrater  
14 variability was kept to a minimum.

15

## 16 **Quantitative immunohistochemistry (qIHC) of phosphorylated Tau**

17 To assess the load of phosphorylated tau, quantitative immunohistochemistry (IHC) analysis  
18 with antibody AT8 was performed on the GTM2 tissues from a subset of postmortem brains  
19 consisting of 75 AD cases, 35 ND individuals and 20 centenarians (Table S12). The details of  
20 IHC staining and region of interest (ROI) identification are described in the Supplementary  
21 Material. Immunoreactive area (percentage) was determined using ImageJ software<sup>71</sup>.

22

## 23 **Correlation between protein abundance and Braak stage or NIA-Amyloid stage**

24 As a first identification of proteins that correlate with Braak stages and NIA Amyloid stages, we  
25 calculated the Pearson correlation in (1) all non-demented individuals and all centenarians, and  
26 (2) all AD patients.

27

## 28 **Braak stage-related protein analysis:**

29 Assuming that protein abundances change between Braak stages<sup>72</sup>, we categorized the data  
30 from AD cases and ND individuals according Braak stages 0/I, II, III, IV, V and VI (Braak stages  
31 0 and I were merged, because there are only a few samples with Braak stage 0). For each  
32 protein, the significance of abundance changes across the six Braak stages was determined  
33 using a one-way ANOVA test. Next, for proteins observed to be significantly changed, we  
34 identified the Braak stage with highest median protein abundance, and the Braak stage with the

1 lowest median protein abundance, then we calculated the log<sub>2</sub> fold changes (LFC) between  
2 these two Braak Stages. Then, we selected the intersection across the proteins with the top 20%  
3 most significant p-values and the proteins with the top 20% absolute LFC (the cutoff of 20% was  
4 set arbitrarily). Up- and down-regulation was considered separately.

5 Second, assuming that protein abundance either increases or decreases with Braak  
6 Stage, we performed a linear regression model, in which the six Braak stages were treated as  
7 continuous variables with equal numerical distances. Here, we selected the intersection of the  
8 proteins with the top 20% most significant p-values in the coefficient of linear regressions *and*  
9 top 20% absolute regression coefficients. Up- and down-regulation was again considered  
10 separately.

11 The union of the results under each assumption was termed the “*Braak stage-related*  
12 *proteins*”, which we will refer to as ‘Braak-proteins’ in subsequent analysis. The proteins  
13 identified under each assumption are separately presented in two volcano plots using the  
14 ggplot2 (version 3.3.5) R-package (Figure S1A and S1B). We used the VennDiagram (version  
15 1.6.20) package in R to indicate the intersection between the proteins identified under each  
16 assumption (Figure S1C).

17

### 18 **Age-related protein analysis: Age-proteins**

19 Age-related proteins, to which we will refer as ‘Age-proteins’ were identified by applying a linear  
20 regression model to ND brain donors, i.e., correlating the level of each protein with age-at-death.  
21 To remove person-specific differences we smoothed the observed protein abundances with  
22 samples of adjacent ages. We first sorted the ND samples according to increasing age. Then,  
23 for each center datapoint of each age, we selected the five nearest datapoints on the left and  
24 right separately, and then calculated the average protein abundance from these 11 datapoints  
25 (Figure S6). The terminal ages for which there were no five samples left or right, were excluded.  
26 For each protein, we fitted a linear regression model across smoothed abundance and age. P-  
27 values of the model coefficients were corrected for multiple testing using “Bonferroni” across all  
28 proteins tested. Changes were considered significant when corrected p-values were <0.05.  
29 Proteins that change in abundance with age are presented in volcano plots using the ggplot2  
30 package (version 3.3.5) in R (Figure S7).

31

### 32 **Clustering of proteins**

33 We used hierarchical clustering to cluster the protein abundances (Pearson correlation  
34 coefficient as distance, Ward’s method as linkage<sup>73</sup>). For Braak-proteins, the clustering was

1 performed using protein abundances observed in AD patients and ND individuals, and for Age-  
2 proteins, the clustering was performed using protein abundances observed in ND individuals.  
3 The number of clusters for proteins was defined by evaluating the height of the dendrogram.

#### 5 **Centenarian-specific Braak-related proteins: Cen-Braak proteins**

6 For each Braak-protein, we investigated whether the protein abundances between AD cases  
7 and centenarians at Braak stage IV differed using a t-test; both groups have the same level of  
8 NFT pathology according to Braak stages, but different cognitive status. The Braak stage IV  
9 was used, as we have similar numbers of AD cases and centenarians at this stage. The p-  
10 values were corrected for multiple testing using “Benjamini & Hochberg” method, and  
11 centenarian-specific Braak-proteins, to which we will refer as ‘Cen-Braak proteins’, were  
12 assessed while adhering to a 5% FDR cut-off.

#### 14 **Centenarian-specific age-related proteins: Cen-Age proteins**

15 To identify protein abundances that are significantly different in centenarians than would be  
16 expected based on their age, we extrapolated the abundances of each Age-protein to  
17 ages >100 years (centenarians) according to the associated regression coefficient of the fitted  
18 linear model on the non-demented individuals. Then, to identify centenarian-specific age-related  
19 proteins, ‘Cen-Age proteins’, we used a one-side t-test (FDR<0.05) to identify significant  
20 differences between observed and expected protein abundances in centenarians.

#### 22 **Protein-dependent biological age of centenarians**

23 To estimate the protein-specific biological brain-age of the centenarians, we calculated the  
24 difference in the average protein abundances between centenarians and the younger non-  
25 demented age-continuum. For each Cen-Age protein, we grouped the non-demented individuals  
26 per 10-year age-interval. Next, we calculated the absolute difference in the average protein  
27 abundances between centenarians and non-demented individuals from each age-interval. The  
28 age-interval with the smallest absolute difference was considered to be the biological age-  
29 interval for the centenarians based on the Cen-Age protein of interest.

30 Next, we assigned the mean age of non-demented individuals in this age-interval as the  
31 biological age of (all) centenarians, and the difference between this age and the mean age of  
32 the centenarians represents the estimated number of years the centenarians are biologically  
33 younger than their chronological age based on this Cen-Age protein. For each Cen-Age protein,  
34 this number of years was calculated, and the median years with interquartile range (IQR) across

1 all Cen-Age proteins indicated how many years centenarians are biologically younger than their  
2 chronological age overall based on all Cen-Age proteins.

3

#### 4 **Pathway enrichment analysis**

5 Pathway analysis was performed using topGO package in Bioconductor. The classic “Fisher”  
6 test was used to calculate the p-value, and the nodeSize was set to 5. All reliably measured  
7 proteins (n=3,448) are used as background protein list. The p-values were corrected using  
8 “Benjamini & Hochberg” method, and significance of enriched gene ontology (GO) terms was  
9 assessed while adhering to a 5% FDR cutoff.

10

#### 11 **Cell type enrichment analysis**

12 Cell type enrichment analysis was performed as described previously <sup>74</sup>. In short, since the  
13 brain proteins were measured from the tissue of the middle temporal lobe, we used a  
14 combination of single-cell RNA-seq data of 466 cells from eight adult control donors <sup>75</sup> and  
15 single-nuclei RNA-seq data of 15,928 cells from eight adult control donors <sup>76</sup> from temporal  
16 cortical tissue to generate the normalized gene expression data and cell type label matrices,  
17 which were subsequently used for expression-weighted cell type enrichment analysis using the  
18 EWCE R-package, version 1.2.0 <sup>18</sup>. In addition, if a protein that was measured from our samples  
19 showed values  $\geq 0.5$  for a certain cell type in the normalized gene expression data and cell type  
20 label matrices, it was considered a protein marker of that cell type.

21
